# Supplementary material for: Three-dimensional ultrathin Sn/polypyrrole nanosheet network as high performance lithium-ion battery anode
Source: Royal Society of Chemistry journal article supplement (doi:10.1039/c4ra09114k), 2014-01-01
Supplement: c4ra09114k1.pdf [file c4ra09114k1.pdf]

**- Supporting Information -**

**Three-dimensional ultrathin Sn/polypyrrole nanosheets network as high performance lithium-ion battery anode**

Xin Fan<sup>a</sup> · Anni Jiang<sup>a</sup> · Peng Dou<sup>a</sup> · Jin Zhu<sup>a</sup> · Xinhua Xu<sup>a,b\*</sup>

<sup>a</sup>*School of Materials Science and Engineering, Tianjin University, Tianjin 300072, P.R. China*

<sup>b</sup>*Tianjin Key Laboratory of Composite and Functional Materials, Tianjin 300072, P.R. China*

\*Corresponding author. Tel: +86-22-27406127; fax: +86-22-27406127.

*Email address: xhxutju@gmail.com*

*\*Corresponding Author*

**Synthesis of Sn@PPy/PVDF electrode materials**

The as-prepared Sn nanoparticles and 0.1 M SDS were evenly dispersed in deionized water under strong magnetic stirring at room temperature. Then 30  $\mu\text{L}$  pyrrole monomer (98% reagent grade, Sigma Aldrich) was added in the brown suspension. After sufficient stirring for an hour, 600  $\mu\text{L}$  0.7 M ammonium persulfate aqueous solution was slowly dropped into the above solution. Then the solution was stirred for another 5 h to form a homogeneous black Sn@PPy liquid product. Then, Sn@PPy nanoparticles were collected by centrifugation and then washed with distilled water 5 times and ethanol 3 times.

**Fabrication of Sn@PPy/PVDF electrode and Sn/PPy electrode**

The electrodes were prepared by coating the slurry made by dissolving the active material powders (Sn@PPy nanoparticles, or Sn nanoparticles, 80 wt.%), acetylene black (10 wt.%) and polyvinylidene fluoride (PVDF) (10 wt.%) in n-methyl pyrrolidinone onto Cu foil substrates. Then, the electrodes were pressed at 10 MPa and dried at 90 °C under vacuum for 4 h.

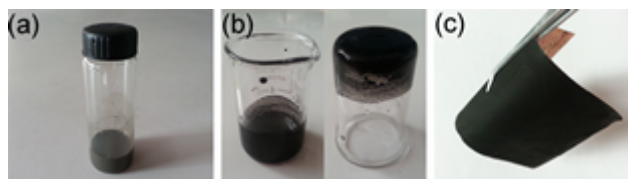

**Fig. S1** Photographs showing the key steps of the 3D Sn/PPy electrode fabrication process. (a) First, Sn nanoparticles and SDS are dispersed in the solution containing the crosslinker (phytic acid) and the pyrrole monomer. (b) Several minutes after adding APS, a homogeneous black Sn/PPy hydrogel product is formed. (c) The electrode material is bladed onto a 5 cm × 20 cm copper foil current collector.

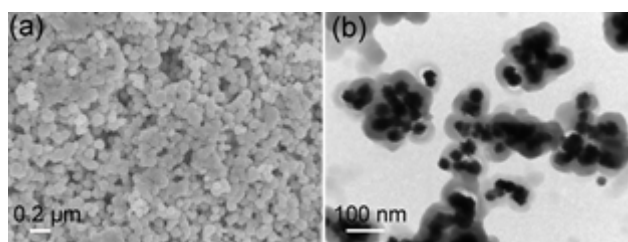

**Fig. S2** (a) SEM image and (b) TEM image of the Sn@PPy nanoparticles composite.

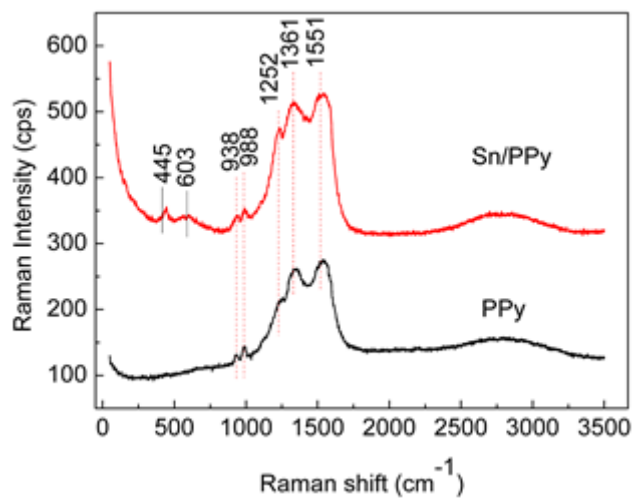

**Fig. S3** Raman spectra of PPy and 3D Sn/PPy composite.

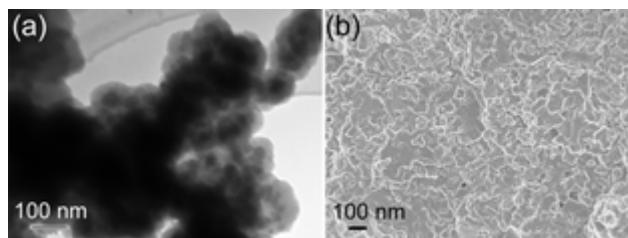

**Fig. S4** (a) SEM and (b) TEM images of the Sn@PPy/PVDF electrode after 200 cycles at a charge/discharge current of 200 mA g<sup>-1</sup>.
